# Supplementary material
Source: PubMed Central journal article supplement (PMC3537219)
Supplement: ASN.2012070713_ASN2012070713SupplementaryData.pdf [file ASN.2012070713_ASN2012070713SupplementaryData.pdf]

**Appendix Table 1. Selected laboratory characteristics of the study population by quartiles of mineral metabolites**

|                                     | Glomerular filtration rate<br>(ml/min/1.73m <sup>2</sup> )<br>Mean ± SD | Urine protein to creatinine ratio<br>Median (IQR) | Serum albumin<br>(g/dl)<br>Mean ± SD | Fibroblast growth factor 23 (pg/ml)<br>Median (IQR) | Parathyroid hormone (pg/ml)<br>Median (IQR) | Serum phosphate<br>(mg/dl)<br>Mean ± SD | 25-OH vitamin D<br>(ng/ml)<br>Median (IQR) | Serum calcium<br>(mg/dl)<br>Mean ± SD |
|-------------------------------------|-------------------------------------------------------------------------|---------------------------------------------------|--------------------------------------|-----------------------------------------------------|---------------------------------------------|-----------------------------------------|--------------------------------------------|---------------------------------------|
| Fibroblast Growth Factor 23 (pg/ml) |                                                                         |                                                   |                                      |                                                     |                                             |                                         |                                            |                                       |
| ≤30.7                               | 54.6 ± 14.8                                                             | 0.05 (0.02, 0.15)                                 | 4.2 ± 0.4                            | --                                                  | 27.5 (19.9, 38.3)                           | 3.4 ± 0.5                               | 11.3 (8.5, 16.8)                           | 9.0 ± 0.5                             |
| 30.8–44.2                           | 50.6 ± 15.0                                                             | 0.05 (0.02, 0.16)                                 | 4.1 ± 0.3                            | --                                                  | 33.9 (24.5, 46.9)                           | 3.4 ± 0.6                               | 12.9 (8.8, 18.2)                           | 8.9 ± 0.5                             |
| 44.3–64.3                           | 43.3 ± 16.5                                                             | 0.08 (0.03, 0.36)                                 | 4.1 ± 0.3                            | --                                                  | 43.1 (26.8, 65.0)                           | 3.6 ± 0.6                               | 14.3 (9.4, 20.0)                           | 8.9 ± 0.4                             |
| ≥64.4                               | 32.5 ± 16.9                                                             | 0.20 (0.05, 1.00)                                 | 4.1 ± 0.4                            | --                                                  | 58.4 (36.4, 99.6)                           | 3.8 ± 0.8                               | 14.5 (9.8, 20.5)                           | 8.9 ± 0.6                             |
| p-trend†                            | <0.001                                                                  | <0.001                                            | 0.001                                | --                                                  | <0.001                                      | <0.001                                  | 0.001                                      | 0.02                                  |
| Parathyroid Hormone (pg/ml)         |                                                                         |                                                   |                                      |                                                     |                                             |                                         |                                            |                                       |
| ≤24.0                               | 55.7 ± 15.2                                                             | 0.04 (0.02, 0.11)                                 | 4.2 ± 0.3                            | 36.2 (25.5, 49.6)                                   | --                                          | 3.4 ± 0.5                               | 15.1 (10.3, 22.8)                          | 9.1 ± 0.5                             |
| 24.1–37.0                           | 49.9 ± 15.1                                                             | 0.05 (0.02, 0.14)                                 | 4.2 ± 0.3                            | 36.9 (27.3, 50.4)                                   | --                                          | 3.4 ± 0.5                               | 14.3 (9.6, 19.9)                           | 9.0 ± 0.4                             |
| 37.1–60.7                           | 44.4 ± 16.2                                                             | 0.09 (0.03, 0.36)                                 | 4.1 ± 0.3                            | 45.6 (35.2, 66.1)                                   | --                                          | 3.5 ± 0.6                               | 12.0 (8.3, 16.8)                           | 8.9 ± 0.5                             |
| ≥60.8                               | 31.0 ± 15.0                                                             | 0.21 (0.05, 1.00)                                 | 4.0 ± 0.4                            | 61.9 (45.1, 93.0)                                   | --                                          | 3.8 ± 0.8                               | 11.8 (8.0, 17.3)                           | 8.6 ± 0.6                             |
| p-trend†                            | <0.001                                                                  | <0.001                                            | <0.001                               | <0.001                                              | --                                          | <0.001                                  | <0.001                                     | <0.001                                |
| Serum Phosphate (mg/dl)             |                                                                         |                                                   |                                      |                                                     |                                             |                                         |                                            |                                       |
| ≤3.1                                | 51.4 ± 15.9                                                             | 0.05 (0.02, 0.12)                                 | 4.1 ± 0.3                            | 38.6 (29.0, 57.3)                                   | 33.0 (22.5, 50.2)                           | --                                      | 14.1 (9.0, 21.2)                           | 8.9 ± 0.5                             |
| 3.2–3.5                             | 48.0 ± 16.0                                                             | 0.06 (0.03, 0.27)                                 | 4.1 ± 0.3                            | 41.0 (29.6, 56.1)                                   | 33.9 (22.5, 54.8)                           | --                                      | 13.3 (8.8, 19.2)                           | 8.9 ± 0.5                             |
| 3.6–3.9                             | 44.4 ± 17.5                                                             | 0.08 (0.03, 0.39)                                 | 4.1 ± 0.3                            | 45.5 (30.7, 61.8)                                   | 38.5 (25.3, 62.9)                           | --                                      | 13.5 (9.4, 17.7)                           | 8.9 ± 0.4                             |
| ≥4.0                                | 34.9 ± 18.6                                                             | 0.14 (0.04, 1.02)                                 | 4.1 ± 0.4                            | 58.0 (38.1, 103.7)                                  | 54.9 (28.1, 99.1)                           | --                                      | 12.4 (8.9, 19.0)                           | 8.8 ± 0.6                             |
| p-trend†                            | <0.001                                                                  | <0.001                                            | 0.4                                  | <0.001                                              | <0.001                                      | --                                      | 0.2                                        | 0.3                                   |
| 25-hydroxyvitamin D (ng/ml)‡        |                                                                         |                                                   |                                      |                                                     |                                             |                                         |                                            |                                       |
| Quartile 1                          | 44.6 ± 18.4                                                             | 0.10 (0.03, 0.45)                                 | 4.1 ± 0.4                            | 38.1 (28.2, 58.6)                                   | 45.5 (29.0, 74.3)                           | 3.5 ± 0.7                               | --                                         | 8.8 ± 0.6                             |
| Quartile 2                          | 46.0 ± 18.6                                                             | 0.08 (0.03, 0.42)                                 | 4.2 ± 0.3                            | 42.3 (30.0, 62.9)                                   | 37.4 (24.5, 62.9)                           | 3.6 ± 0.7                               | --                                         | 8.9 ± 0.5                             |
| Quartile 3                          | 45.8 ± 18.9                                                             | 0.07 (0.03, 0.27)                                 | 4.1 ± 0.3                            | 46.7 (32.3, 69.3)                                   | 34.7 (23.2, 58.9)                           | 3.5 ± 0.6                               | --                                         | 8.9 ± 0.5                             |
| Quartile 4                          | 44.6 ± 15.5                                                             | 0.05 (0.02, 0.19)                                 | 4.1 ± 0.3                            | 49.1 (35.0, 66.7)                                   | 29.8 (20.9, 53.3)                           | 3.5 ± 0.6                               | --                                         | 9.0 ± 0.5                             |
| p-trend†                            | 0.9                                                                     | 0.001                                             | 0.1                                  | 0.009                                               | <0.001                                      | 0.5                                     | --                                         | 0.01                                  |

† p-trend by univariate linear regression. Skewed outcome variables (urine protein to creatinine ratio, fibroblast growth factor 23, parathyroid hormone and 25-hydroxyvitamin D) were log transformed prior to testing

‡ ranges for 25-hydroxyvitamin D quartiles (Q) are season specific, as follows: winter (Q1, ≤8.4; Q2, 8.5–10.9; Q3, 11.0–16.2; Q4, ≥16.3 ng/ml); spring (Q1, ≤7.9; Q2, 8.0–10.9; Q3, 11.0–16.5; Q4, ≥16.6 ng/ml); summer (Q1, ≤10.0; Q2, 10.1–15.2; Q3, 15.3–20.6; Q4, ≥20.7 ng/ml); fall (Q1, ≤11.0; Q2, 11.1–14.7; Q3, 14.8–22.8; Q4, ≥22.9 ng/ml)

**Appendix Table 2. Baseline characteristics by total number of mineral metabolite abnormalities**

| Characteristic:<br>Mean ± SD or n(%)                      | Number of Mineral Metabolism Abnormalities |                   |                    |                      | p-value† |
|-----------------------------------------------------------|--------------------------------------------|-------------------|--------------------|----------------------|----------|
|                                                           | 0<br>N=420                                 | 1<br>N=248        | 2<br>N=108         | 3<br>N=26            |          |
| Age (years)                                               | 56 ± 10                                    | 55 ± 11           | 54 ± 10            | 50 ± 11              | 0.002    |
| Female sex                                                | 171 (40.7%)                                | 83 (33.5%)        | 50 (46.3%)         | 12 (46.2%)           | 0.09     |
| Income‡                                                   |                                            |                   |                    |                      | 0.4      |
| <\$15,000 per yr                                          | 205 (48.8%)                                | 124 (50.0%)       | 44 (40.7%)         | 15 (57.7%)           |          |
| ≥\$15,000 per yr                                          | 142 (33.8%)                                | 76 (30.7%)        | 36 (33.3%)         | 8 (30.8%)            |          |
| Prior cardiovascular disease                              | 219 (52.1%)                                | 135 (54.4%)       | 59 (54.6%)         | 14 (53.9%)           | 0.9      |
| Smoking                                                   |                                            |                   |                    |                      | 0.6      |
| Current                                                   | 137 (32.6%)                                | 64 (25.8%)        | 30 (27.8%)         | 7 (26.9%)            |          |
| Past                                                      | 119 (28.3%)                                | 78 (31.5%)        | 29 (26.9%)         | 8 (30.8%)            |          |
| Never                                                     | 164 (39.1%)                                | 106 (42.7%)       | 49 (45.4%)         | 11 (42.3%)           |          |
| Body mass index (kg/m <sup>2</sup> )                      | 30.1 ± 6.2                                 | 30.3 ± 6.7        | 31.6 ± 6.7         | 30.5 ± 7.5           | 0.08     |
| Glomerular filtration rate (ml/min/1.73 m <sup>2</sup> )§ | 53.4 ± 14.8                                | 42.3 ± 16.1       | 28.0 ± 12.4        | 16.8 ± 8.9           | <0.001   |
| Stage of chronic kidney disease                           |                                            |                   |                    |                      | <0.001   |
| 2 (GFR ≥ 60 ml/min/1.73 m <sup>2</sup> )                  | 136 (32.4%)                                | 34 (13.7%)        | 2 (1.9%)           | 0 (0%)               |          |
| 3a (GFR 45–59 ml/min/1.73 m <sup>2</sup> )                | 156 (37.1%)                                | 70 (28.2%)        | 10 (9.3%)          | 1 (3.9%)             |          |
| 3b (GFR 30–44 ml/min/1.73 m <sup>2</sup> )                | 103 (24.5%)                                | 83 (33.5%)        | 25 (23.2%)         | 2 (7.7%)             |          |
| 4–5 (GFR < 30 ml/min/1.73 m <sup>2</sup> )                | 22 (5.2%)                                  | 61 (24.6%)        | 71 (65.7%)         | 23 (88.5%)           |          |
| Urine protein to creatinine ratio§*                       | 0.05 (0.02, 0.15)                          | 0.08 (0.03, 0.36) | 0.21 (0.07, 1.05)  | 1.30 (0.98, 2.32)    | <0.001   |
| Serum albumin (mg/dl)                                     | 4.2 ± 0.3                                  | 4.1 ± 0.3         | 4.0 ± 0.4          | 4.0 ± 0.4            | <0.001   |
| Serum fibroblast growth factor 23 (pg/ml) *               | 32.5 (24.4, 40.0)                          | 60.6 (51.6, 82.0) | 71.6 (59.7, 109.4) | 180.5 (103.2, 427.8) | <0.001   |
| Fibroblast growth factor 23 >50 pg/ml                     | 0 (0%)                                     | 195 (78.6%)       | 107 (99.1%)        | 26 (100%)            |          |
| Parathyroid hormone (pg/ml) *                             | 28 (21, 39)                                | 43 (28, 61)       | 93 (74, 128)       | 153 (105, 183)       | <0.001   |
| Parathyroid hormone >65 pg/ml                             | 0 (0%)                                     | 51 (20.6%)        | 99 (91.7%)         | 26 (100%)            |          |
| Serum phosphate (mg/dl)                                   | 3.4 ± 0.5                                  | 3.5 ± 0.6         | 3.8 ± 0.6          | 5.3 ± 0.7            | <0.001   |
| Phosphate >4.6 mg/dl                                      | 0 (0%)                                     | 2 (0.8%)          | 10 (9.3%)          | 26 (100%)            |          |
| 25-hydroxyvitamin D (ng/ml) *                             | 13.0 (8.8, 18.5)                           | 14.3 (9.4, 21.4)  | 12.8 (8.7, 18.3)   | 11.8 (9.0, 17.6)     | 0.8      |
| Serum calcium (mg/dl)                                     | 9.0 ± 0.5                                  | 8.9 ± 0.5         | 8.7 ± 0.5          | 8.4 ± 0.8            | <0.001   |

†p-value by Chi square (categorical variables) or p-trend by univariate linear regression (continuous variables). Skewed outcome variables (urine protein to creatinine ratio, fibroblast growth factor 23, parathyroid hormone and 25-hydroxyvitamin D) were log transformed prior to testing

‡total does not sum to 100% due to participant non-response

§Glomerular filtration rate was missing in 3 participants; urine protein to creatinine ratio was missing in 26 participants

\*median (interquartile range)

GFR, glomerular filtration rate

Appendix figure 1a. Cumulative incidence of end-stage renal disease or death by quartiles of fibroblast growth factor 23

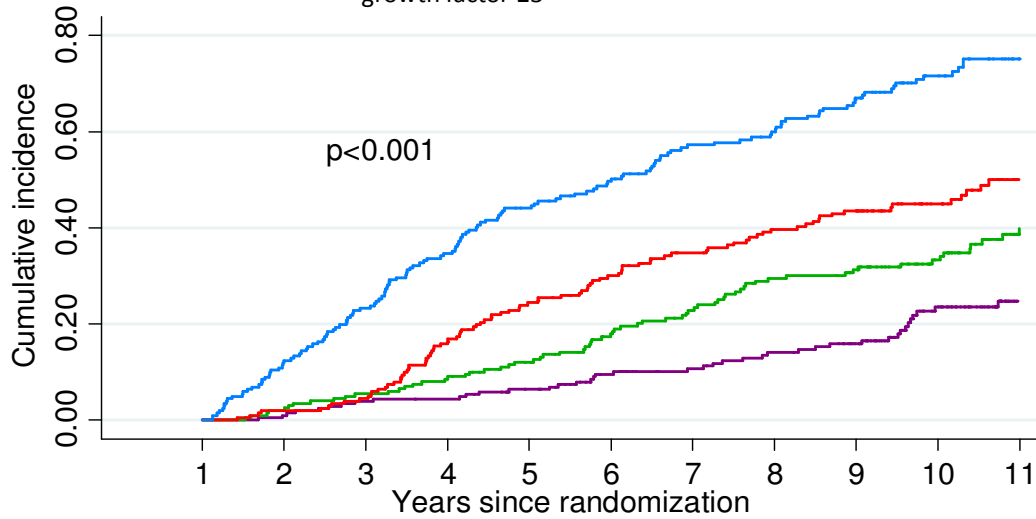

Number at risk

|            |     |     |     |     |     |     |     |     |    |    |
|------------|-----|-----|-----|-----|-----|-----|-----|-----|----|----|
| Quartile 1 | 203 | 197 | 195 | 185 | 167 | 156 | 148 | 137 | 88 | 39 |
| Quartile 2 | 196 | 189 | 183 | 170 | 150 | 139 | 126 | 117 | 86 | 50 |
| Quartile 3 | 198 | 193 | 169 | 150 | 135 | 120 | 109 | 99  | 67 | 30 |
| Quartile 4 | 177 | 155 | 132 | 111 | 97  | 79  | 73  | 59  | 37 | 13 |

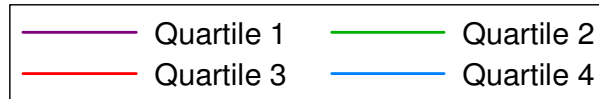

Appendix figure 1b. Cumulative incidence of end-stage renal disease or death by quartiles of parathyroid hormone

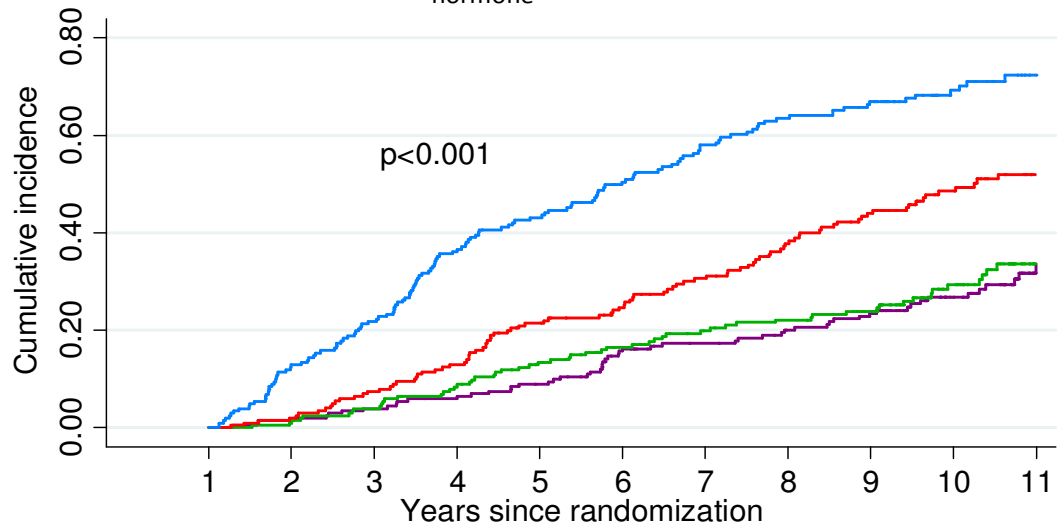

Number at risk

|            |     |     |     |     |     |     |     |     |    |    |
|------------|-----|-----|-----|-----|-----|-----|-----|-----|----|----|
| Quartile 1 | 199 | 194 | 189 | 180 | 160 | 150 | 142 | 132 | 95 | 36 |
| Quartile 2 | 201 | 195 | 185 | 170 | 154 | 140 | 135 | 124 | 78 | 38 |
| Quartile 3 | 197 | 186 | 175 | 152 | 140 | 127 | 112 | 97  | 71 | 40 |
| Quartile 4 | 176 | 158 | 129 | 113 | 94  | 76  | 66  | 58  | 33 | 18 |

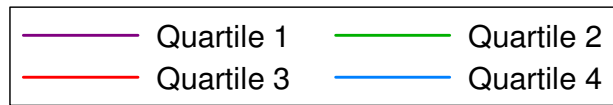

Appendix figure 1c. Cumulative incidence of end-stage renal disease or death by quartiles of serum phosphate

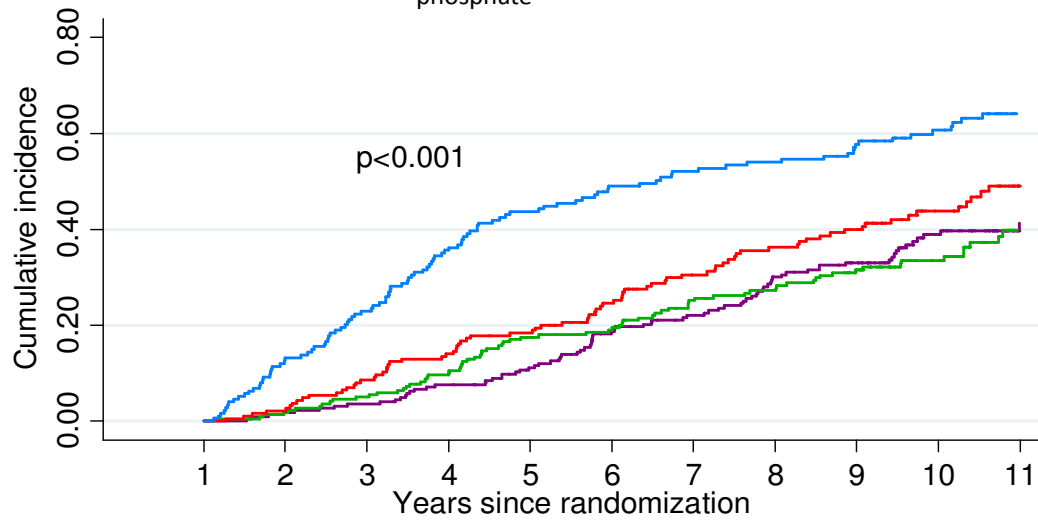

Number at risk

|            |     |     |     |     |     |     |     |     |    |    |
|------------|-----|-----|-----|-----|-----|-----|-----|-----|----|----|
| Quartile 1 | 222 | 218 | 208 | 193 | 169 | 158 | 140 | 128 | 79 | 34 |
| Quartile 2 | 214 | 207 | 196 | 173 | 162 | 145 | 137 | 121 | 87 | 37 |
| Quartile 3 | 181 | 169 | 159 | 150 | 129 | 111 | 102 | 94  | 61 | 35 |
| Quartile 4 | 151 | 134 | 112 | 96  | 85  | 77  | 74  | 66  | 49 | 26 |

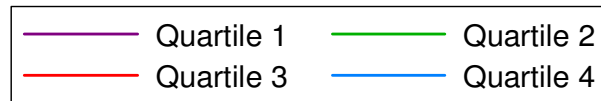

Appendix figure 1d. Cumulative incidence of end-stage renal disease or death by quartiles of 25-hydroxyvitamin D

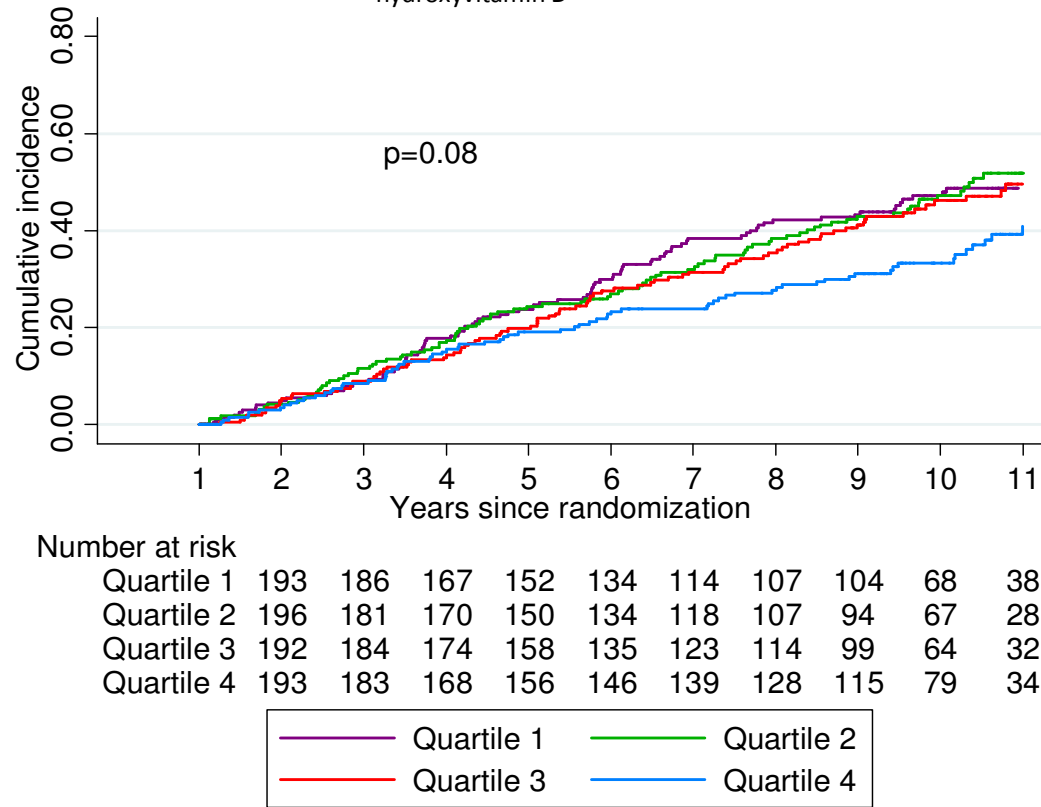

Appendix Figure 1. Cumulative incidence of end-stage renal disease or death by quartiles of mineral metabolism parameters

(A) fibroblast growth factor 23; (B) parathyroid hormone; (C) serum phosphate; and (D) 25-hydroxyvitamin D. Quartiles of 25-hydroxyvitamin D are season-specific. Follow-up began 1 year after randomization at the time baseline mineral metabolites were measured. P-values were derived from the log-rank test.
